# Supplementary material for: Primary Results From the Understanding Outcomes With the S-ICD in Primary Prevention Patients With Low Ejection Fraction (UNTOUCHED) Trial
Source: PubMed Central journal article supplement — Circulation. 2020 Oct 19;143(1):7–17. doi: 10.1161/CIRCULATIONAHA.120.048728 (PMC7752215; doi:10.1161/circulationaha.120.048728), 2020-10-19
Supplement: cir-143-07-s001.pdf [file cir-143-07-s001.pdf]

## SUPPLEMENTAL MATERIAL

Supplemental Table 1. Pooling Analysis

| Endpoint Details |                                                  |                 |            |                  | Permanent AF | No Permanent AF | Pooling Analysis<br>(Likelihood Ratio Test:<br>Chi-square with 1 d.f.)                                                                                 |         |
|------------------|--------------------------------------------------|-----------------|------------|------------------|--------------|-----------------|--------------------------------------------------------------------------------------------------------------------------------------------------------|---------|
| Endpoint Type    | Description                                      | Analysis Type   | Time Frame | Performance Goal | N            | N               | Baseline Covariates                                                                                                                                    | P-value |
| Primary          | Primary Endpoint - Inappropriate Shock Free Rate | Intent to Treat | 18 months  | > 91.6%          | 24           | 1087            | Anticoagulants, Antiplatelets, Monomorphic VT, Other VT Arrhythmias                                                                                    | 0.4867  |
| Primary          | Primary Endpoint - Inappropriate Shock Free Rate | Per Protocol    | 18 months  | > 91.6%          | 24           | 1087            | Anticoagulants, Antiplatelets, Monomorphic VT                                                                                                          | 0.5300  |
| Secondary        | All-Cause Shock Free Rate                        | Intent to Treat | 18 months  | > 85.8%          | 24           | 1087            | Anticoagulants, Digitalis, Monomorphic VT, Ventricular Fibrillation, Other VT Arrhythmias, LVEF (%), Weight (lb), Body Mass Index (kg/m <sup>2</sup> ) | 0.6555  |
| Secondary        | All-Cause Shock Free Rate                        | Per Protocol    | 18 months  | > 85.8%          | 24           | 1087            | Anticoagulants, Digitalis, Monomorphic VT, Ventricular Fibrillation, LVEF (%), Weight (lb)                                                             | 0.7915  |
| Secondary        | Complication Free Rate                           | N/A             | 30 days    | > 93.8%          | 24           | 1092            | Nitrates, Statins, Weight (lb)                                                                                                                         | 0.3365  |

Supplemental Figure 1. Inappropriate Shock Rate by Device Type.

Kaplan-Meier Post-Hoc Analysis: Risk of IAS by Device Type

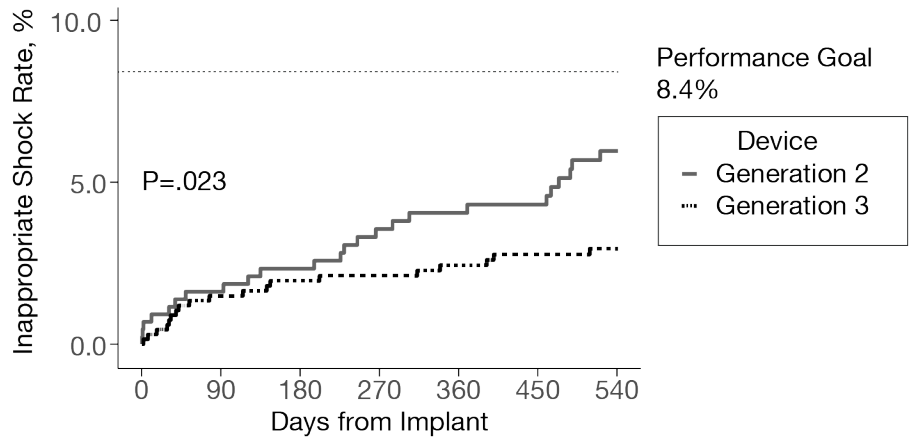

| Subjects at Risk |     |       |       |       |
|------------------|-----|-------|-------|-------|
|                  | 0   | 90    | 180   | 270   |
| Generation 2     | 436 | 408   | 376   | 312   |
|                  |     | (2.3) | (4.1) | (6.0) |
| Generation 3     | 675 | 630   | 591   | 497   |
|                  |     | (2.0) | (2.4) | (2.9) |

Supplemental Figure 2 Inappropriate Shock Rate by Incision Technic.

Kaplan-Meier Post-Hoc Analysis: Risk of IAS by Incision Technique

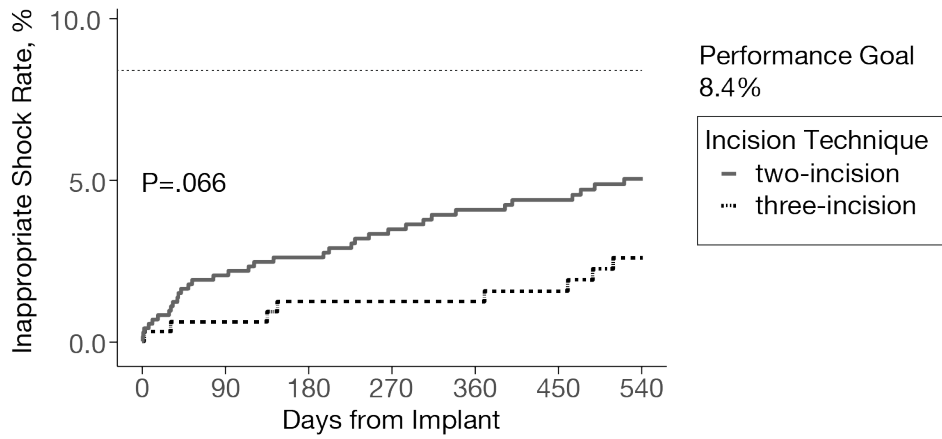

| Subjects at Risk |     |       |       |       |
|------------------|-----|-------|-------|-------|
| two-incision     | 343 | 328   | 312   | 268   |
|                  |     | (2.5) | (3.9) | (4.9) |
| three-incision   | 768 | 710   | 656   | 563   |
|                  |     | (1.2) | (1.2) | (2.5) |

Supplemental Figure 3 Predictors of Complications

**A. Univariable**

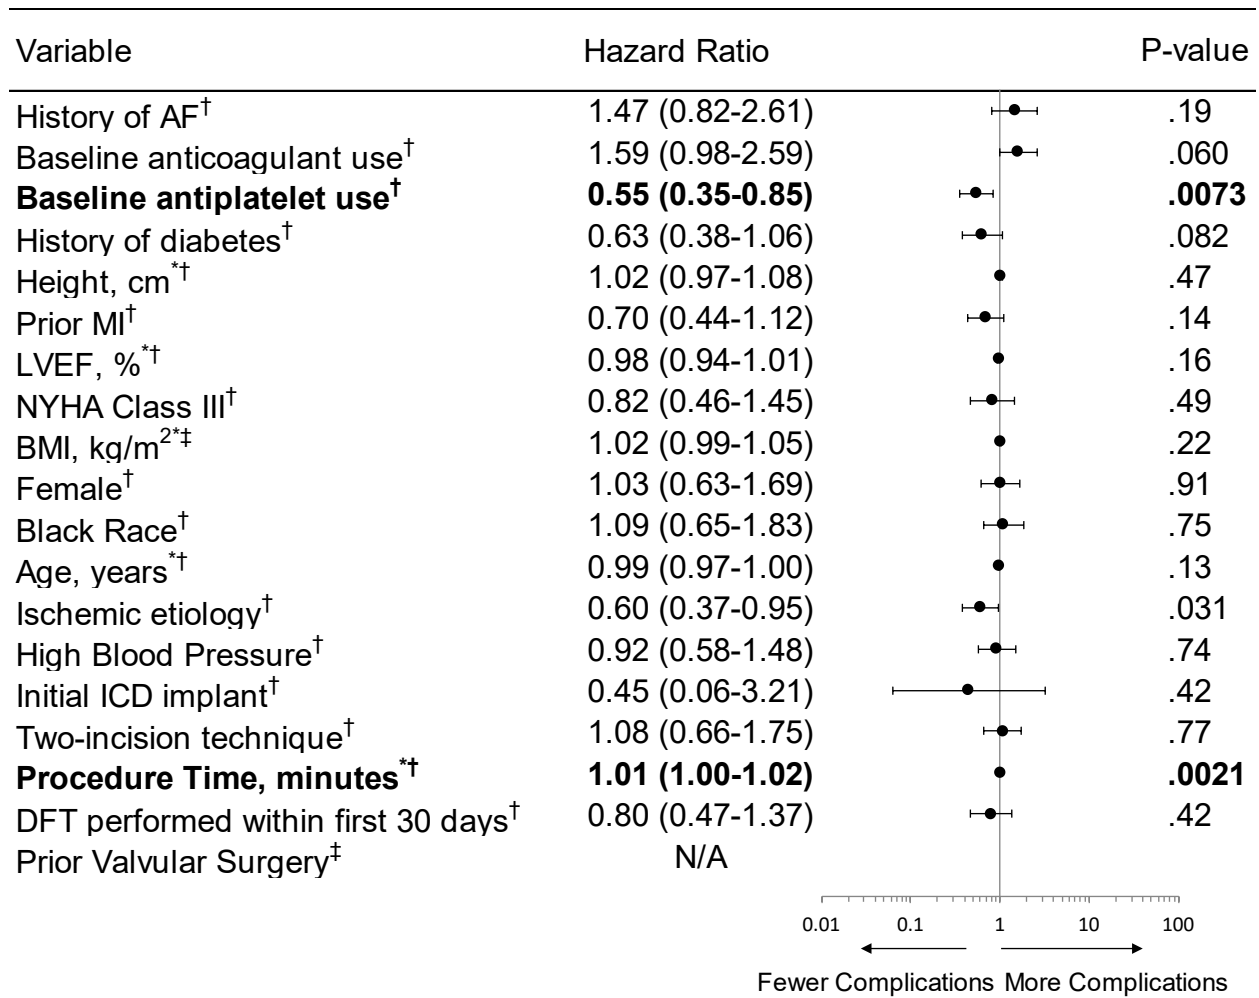

**B. Multivariable**

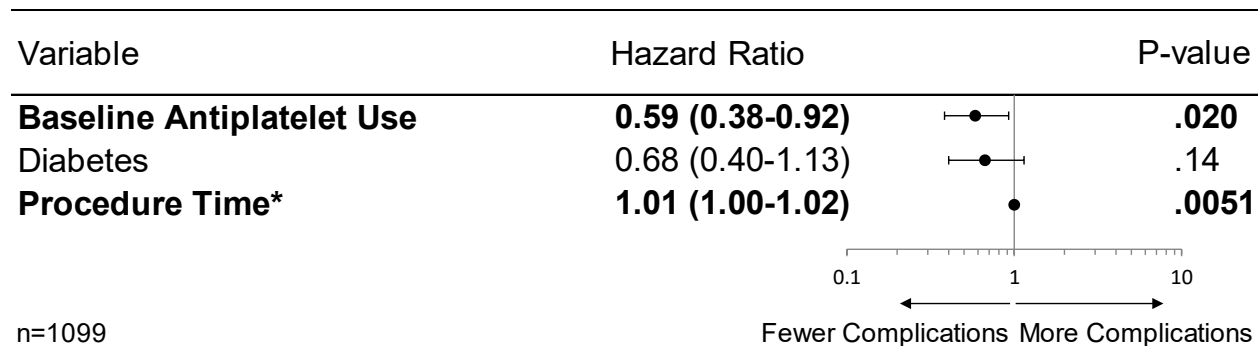

n=1099

Predictors of complications at 18 months based on hazard analysis. A: Univariable model. BMI and prior valvular surgery were the only variables that failed the proportional hazards assumption. B: Multivariable model. AF = atrial fibrillation; BMI = body mass index; DFT = defibrillation testing; Gen 3 = Generation 3 device; LVEF = left ventricular ejection fraction; MI = myocardial infarction; NYHA = New York Heart Association.

\*Continuous variable

†Satisfied the proportional hazard assumption

‡Proportional hazard assumption not verified

## Supplemental Table 2

### Table of Complications

| Classification                                   | Events    | N (%)           |
|--------------------------------------------------|-----------|-----------------|
| <b>Sub-optimal position/movement</b>             | <b>12</b> | <b>11 (1.0)</b> |
| Suboptimal electrode position                    | 3         | 3 (0.3)         |
| Electrode migration/revision                     | 5         | 5 (0.4)         |
| Electrode movement                               | 1         | 1 (0.1)         |
| Electrode erosion                                | 1         | 1 (0.1)         |
| PG erosion                                       | 1         | 1 (0.1)         |
| PG migration                                     | 1         | 1 (0.1)         |
| <b>Sensing/device function</b>                   | <b>12</b> | <b>12 (1.1)</b> |
| Inappropriate therapy / Oversensing              | 7         | 7 (0.6)         |
| Device shocked 5 times before conversion         | 1         | 1 (0.1)         |
| Premature cell battery depletion – PG            | 3         | 3 (0.3)         |
| Random component failure – Therapy available     | 1         | 1 (0.1)         |
| <b>Conversion test-related</b>                   | <b>10</b> | <b>10 (0.9)</b> |
| Out of Range shock impedance – Electrode         | 1         | 1 (0.1)         |
| Unable to convert VT/VF with S-ICD               | 9         | 9 (0.8)         |
| <b>Device system infection</b>                   | <b>12</b> | <b>12 (1.1)</b> |
| Device system infection (acute)                  | 8         | 8 (0.7)         |
| Device system infection (>30d post implant)      | 4         | 4 (0.4)         |
| <b>Post-op healing / pain management</b>         | <b>23</b> | <b>23 (2.1)</b> |
| Electrode suture discomfort                      | 1         | 1 (0.1)         |
| Device system discomfort                         | 4         | 4 (0.4)         |
| Post-surgical wound discomfort PG site           | 4         | 4 (0.4)         |
| Incisional/Superficial infection                 | 5         | 5 (0.4)         |
| Suspected infection – Incisional/Superficial     | 1         | 1 (0.1)         |
| Hematoma – PG pocket                             | 4         | 4 (0.4)         |
| Inadequate healing of incision site              | 2         | 2 (0.2)         |
| Physical trauma                                  | 2         | 2 (0.2)         |
| <b>Other procedure-related</b>                   | <b>12</b> | <b>12 (1.1)</b> |
| Adverse reaction – Respiratory                   | 1         | 1 (0.1)         |
| Adverse reaction – Hypotension                   | 3         | 3 (0.3)         |
| Adverse reaction – Medication/Anaphylactic shock | 1         | 1 (0.1)         |
| Adverse reaction – HF symptoms                   | 1         | 1 (0.1)         |
| Acute blood loss                                 | 1         | 1 (0.1)         |
| postoperative urinary retention                  | 1         | 1 (0.1)         |
| Hemodynamic instability – DFT testing            | 1         | 1 (0.1)         |
| Fascial defect closure                           | 1         | 1 (0.1)         |
| Suture revision                                  | 1         | 1 (0.1)         |
| Syncope                                          | 1         | 1 (0.1)         |
| <b>Other patient-related</b>                     | <b>2</b>  | <b>2 (0.2)</b>  |
| Outcome of elective MV and LAA closure surgery   | 1         | 1 (0.1)         |
| Weight loss                                      | 1         | 1 (0.1)         |

### Supplemental Table 3

#### Causes of Death

| <b>Cause of Death</b>           | <b>Number of Patients</b> |
|---------------------------------|---------------------------|
| <b>Cardiac</b>                  | <b>28</b>                 |
| <i>Arrhythmic</i>               | 4                         |
| <i>Ischemic etiology, N (%)</i> | 2                         |
| <i>Pump Failure</i>             | 14                        |
| <i>Unknown</i>                  | 8                         |
| <b>Non Cardiac</b>              | <b>21</b>                 |
| <b>Unknown</b>                  | <b>8</b>                  |
| <b>Total</b>                    | <b>57</b>                 |

Supplemental Table 4

Tipping point analyses

| Endpoint                                   | Rate Among Subjects with Complete Data | Tipping Point | Total Subjects with Incomplete Data | P (observe events>Tipping point), given Rate Among Subjects with Complete Data |
|--------------------------------------------|----------------------------------------|---------------|-------------------------------------|--------------------------------------------------------------------------------|
| Primary: Inappropriate Shocks in 18 months | 41/826 (5.0%)                          | 37            | 286                                 | <.0001                                                                         |
| Secondary: All Cause Shocks in 18 months   | 94/844 (11.1%)                         | 45            | 268                                 | <.0001                                                                         |
| Secondary: 30 day complications            | 47/1109 (4.2%)                         | >7            | 7                                   | N/A                                                                            |

In regards the 30-day complication endpoint, the tipping point is greater than the total subjects with incomplete data, thus the probability of missing the endpoint if we had data from these patients is zero.



Supplemental Table 5

Study Sites and Investigators

| <b>Investigational Site</b>                | <b>Primary Investigator</b>        |
|--------------------------------------------|------------------------------------|
| The Toledo Hospital                        | Johan Aasbo, Timothy Phelan        |
| William Beaumont Hospital                  | Hazim Al-Ameri                     |
| Genesis Healthcare System                  | Abdulhay Albirini                  |
| Albany Medical Center                      | Rizwan Alimohammad                 |
| Hospital Virgen De La Salud                | Miguel Arias                       |
| Hospital de la Pitie-Salpetriere           | Nicolas Badenco                    |
| Russells Hall Hospital                     | Craig Barr                         |
| CHU Dijon                                  | Geraldine Bertaux                  |
| Methodist Hospital of Indianapolis         | Deepak Bhakta                      |
| Good Samaritan Hospital - San Jose         | Sanjay Bindra                      |
| CHRU Nancy Brabois                         | Hugues Blangy                      |
| St. Antonius Ziekenhuis                    | Lucas Boersma                      |
| Clinique Pasteur                           | Serge Boveda                       |
| University Hospital Odense                 | Johansen Brock                     |
| CorVita Science Foundation                 | Martin Burke                       |
| Universitaetsmedizin Greifswald            | Mathias Busch                      |
| Hospital Miguel Servet                     | Naiara Calvo                       |
| Blackpool Victoria NHS Trust Direct        | Christopher Cassidy                |
| CHU de Strasbourg                          | Michel Chauvin, Halim Marzak       |
| Long Island Jewish Medical Center          | Jason Chinitz                      |
| Sentara Norfolk General Hospital           | Allen Ciuffo                       |
| Yale University School of Medicine         | Jude Clancy                        |
| North Mississippi Medical Center           | Karl Crossen                       |
| Azienda Ospedaliera Papa Giovanni XXIII    | Paolo De Filippo                   |
| CHU La Timone Hospital                     | Jean-Claude Deharo                 |
| Lutheran Medical Group                     | Fausto Devecchi, Sreekanth Karanam |
| Heart Center Research, LLC                 | Jay Dinerman                       |
| University of Southern California Hospital | Rahul Doshi                        |
| University Hospital of Muenster            | Lars Eckardt                       |
| Salem Hospital                             | Matthew Fedor                      |
| University of Utah Hospital and Clinics    | Roger Freedman                     |
| University of North Carolina Hospital      | Anil Gehi                          |
| Clinique Saint-Jean                        | Peter Goethals                     |
| Universitaetsklinik Eppendorf              | Nils Gosau                         |
| Abington Memorial Hospital                 | Charles Gottlieb                   |
| HealthEast St. Joseph's Hospital           | Gregory Granrud                    |
| St. Joseph Mercy Hospital                  | Radmira Greenstein                 |

|                                                                   |                                   |
|-------------------------------------------------------------------|-----------------------------------|
| Aultman Hospital                                                  | Firas Hamdan                      |
| Beth Israel Medical Center                                        | Sam Hanon                         |
| Sharp Grossmont Hospital                                          | Alborz Hassankhani                |
| AnMed Health                                                      | Rick Henderson                    |
| University Hospital Frankfurt                                     | Stefan Hohnloser                  |
| Strong Memorial Hospital of the University of Rochester           | David Huang                       |
| CH Annecy                                                         | Didier Irles                      |
| Virginia Commonwealth University Health System                    | Gautham Kalahasty                 |
| Deborah Heart and Lung Center                                     | Pedram Kazemian                   |
| Tallahassee Memorial Hospital                                     | Farhat Khairallah                 |
| St. Joseph Hospital                                               | Brian Kim                         |
| Evergreen Hospital Medical Center                                 | Edward Kim                        |
| Deutsches Herzzentrum Berlin                                      | Christoph Klein                   |
| Northwestern Memorial Hospital                                    | Bradley Knight                    |
| Academisch Medisch Centrum                                        | Reinoud Knops                     |
| HealthCare Partners Cardiology                                    | Niuton Koide                      |
| Centra Stroobants Cardiovascular Center                           | Richard Kuk                       |
| St. Bartholomews Hospital                                         | Pier Lambiase                     |
| CHRU Hopital Pontchaillou                                         | Christophe Leclercq               |
| Alta Bates Summit Medical Center                                  | Michael Lee                       |
| Mercy Research                                                    | Shang-Chiun Lee                   |
| Unfallkrankenhaus Berlin Marzahn                                  | Corinna Lenz                      |
| Northern General Hospital                                         | Nigel Lewis                       |
| Durham VA Medical Center                                          | Robert Lewis                      |
| Cardiovascular Associates of the Delaware Valley                  | George Mark                       |
| CHRU de Lille                                                     | Christelle Marquie                |
| St. Mary's Madison                                                | Kelly McDonnell                   |
| Glendale Adventist Medical Center                                 | John Mckenzie                     |
| Emory University Hospital                                         | Faisal Merchant                   |
| Rex Hospital                                                      | Sameh Mobarek                     |
| Cardiocentro Ticino                                               | Tiziano Moccetti                  |
| Institut universitaire de Cardiologie et de Pneumologie de Quebec | Franck Molin, Francois Philliopon |
| Azienda Ospedaliera Universitaria Integrata di Verona             | Giovanni Morani                   |
| Ochsner Clinic Foundation                                         | Daniel Morin                      |
| Glenfield Hospital                                                | G. Ng                             |
| Peninsula Cardiology Associates                                   | Emmanuel Nsah                     |
| South Texas Veterans Health Care System                           | Manoj Panday                      |
| CHU Montpellier                                                   | Jean-Luc Pasquie                  |
| Hospital Clinico San Carlos                                       | Nicasio Castellano Perez          |
| Hospital San Lucas                                                | Francisco Perez-Gil               |
| Centralny Szpital Kliniczny Uniwersytetu Medycznego               | Pawel Ptaszynski                  |

|                                                  |                    |
|--------------------------------------------------|--------------------|
| Alabama Cardiovascular Group                     | Anil Rajendra      |
| University of Iowa Hospitals and Clinics         | Troy Rhodes        |
| Southampton University Hospital                  | Paul Roberts       |
| Cox Health                                       | Steven Rowe        |
| Cooper Hospital - University Medical Center      | Andrea Russo       |
| University of Pittsburgh Medical Center          | Samir Saba         |
| Baptist Medical Center                           | Venkata Sagi       |
| Cardiology Physicians PA                         | Brian Sarter       |
| Centracare Heart and Vascular Center             | John Schoenhard    |
| St. Vincent's Hospital                           | John Schutzman     |
| Mayo Clinic Phoenix                              | Luis Scott         |
| CHI Franciscan Health System                     | Nathan Segerson    |
| AdventHealth Orlando                             | Naushad Shaik      |
| CardioVascular Institute of Michigan P.C.        | Ali Shakir         |
| Memorial Mission Hospital                        | Matthew Smelley    |
| University Hospital Zurich                       | Jan Steffel        |
| Medical University of South Carolina             | J. Lacy Sturdivant |
| Heartland Cardiology                             | Ghiyath Tabbal     |
| Mercy Gilbert Medical Center                     | Drory Tandler      |
| Erasmus MC - University Medical Center Rotterdam | Dominic Theuns     |
| Universitair Ziekenhuis Gent                     | Liesbeth Timmers   |
| Sacred Heart Medical Center at Riverbend         | Matthew Trojan     |
| The Nebraska Medical Center                      | Shane Tsai         |
| University of Chicago Hospital                   | Gaurav Upadhyay    |
| University Hospital Augusta                      | Santosh Varkey     |
| Azienda Ospedaliero Universitaria Pisana         | Stefano Viani      |
| Christus Trinity Mother Frances Health System    | Stanislav Weiner   |
| Ohio State University Medical Center             | Raul Weiss         |
| Advanced Cardiovascular Specialists              | Sherman Wiggins    |
| Liverpool Heart and Chest Hospital               | David Wright       |
| Harbor UCLA Medical Center                       | Andrew Zadeh       |
| Universitaetsklinikum Heidelberg                 | Edgar Zitron       |
